# Supplementary material for: Symbionts protect aphids from parasitic wasps by attenuating herbivore-induced plant volatiles
Source: PubMed Central journal article supplement (PMC5709398; doi:10.1038/s41467-017-01935-0), 2017-11-30
Supplement: 41467_2017_1935_MOESM1_ESM.pdf [file 41467_2017_1935_MOESM1_ESM.pdf]

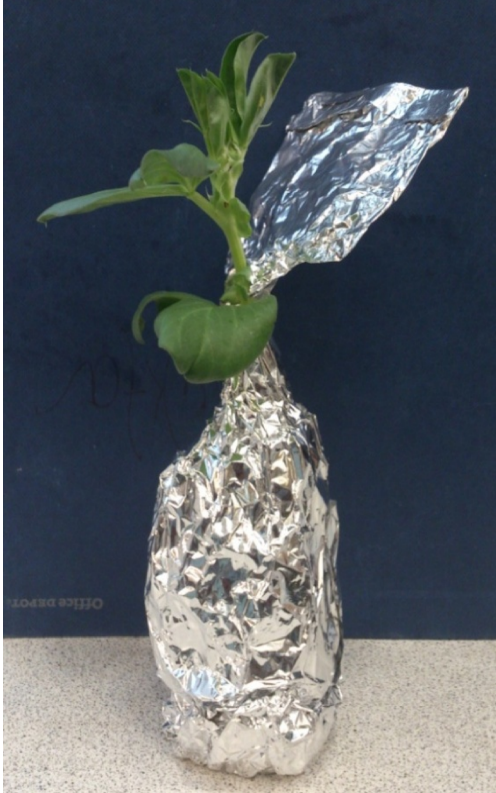

**Supplementary Fig. 1**

Image of a *Vicia faba* plant with its roots, soil and the leaf onto which clip cages were attached, covered with aluminum foil to test for systemic release of plant volatiles.

### Supplementary Table 1

Spearman's rank correlation tests between the relative number of progeny produced by symbiont-carrying and symbiont-free *Acyrtosiphon pisum* aphids during five days on *Vicia faba* plants, and the proportion of time spent by parasitic wasps *Aphidius ervi* above symbiont-infested plants. Each row represents one test with a total of ten plant pairs (n=10). A plot showing these relationships is presented in Fig. 2.

| Symbiont species            | Symbiont strain | Cured / microinjected | Systemic response | S statistic | p-value | rho   |
|-----------------------------|-----------------|-----------------------|-------------------|-------------|---------|-------|
| <i>Hamiltonella defensa</i> | 101             | cured                 | no                | 212         | 0.4274  | -0.28 |
| <i>H. defensa</i>           | 132             | cured                 | no                | 210         | 0.4483  | -0.27 |
| <i>H. defensa</i>           | 302             | cured                 | no                | 170         | 0.9457  | -0.03 |
| <i>H. defensa</i>           | 132             | microinjected         | no                | 204         | 0.5139  | -0.24 |
| <i>H. defensa</i>           | 404             | microinjected         | no                | 156         | 0.8916  | 0.05  |
| <i>H. defensa</i>           | 132             | microinjected         | yes               | 162         | 0.9728  | 0.02  |
| <i>Regiella insecticola</i> | 319             | cured                 | no                | 142         | 0.6436  | -0.18 |
| <i>R. insecticola</i>       | 126             | cured                 | no                | 172         | 0.9186  | -0.04 |
| <i>R. insecticola</i>       | 319             | microinjected         | no                | 186         | 0.7329  | -0.13 |
| <i>R. insecticola</i>       | 313             | microinjected         | no                | 174         | 0.8916  | -0.05 |
| <i>Spiroplasma</i>          | 227             | microinjected         | no                | 154         | 0.8648  | 0.07  |
| <i>Spiroplasma</i>          | 237             | microinjected         | no                | 214         | 0.4070  | -0.30 |
| <i>Serratia symbiotica</i>  | 619             | microinjected         | no                | 264         | 0.0731  | -0.60 |
| <i>Rickettsiella</i>        | 620             | microinjected         | no                | 130         | 0.5599  | 0.21  |

## Supplementary Table 2

Volatile compounds found in the headspace of *Vicia faba* plants infested with *Acyrtosiphon pisum* aphids carrying the symbiont *Hamiltonella defensa*, or not. Volatiles are ranked based on their variable importance in projection (VIP) in the Principal least squares discriminant analysis (PLS-DA). Volatile identity, type of volatile, its VIP score, retention time and its quantity are shown. Quantities are expressed as peak areas divided by dry plant weight (g). For the compounds with a VIP score larger than 1, pairwise comparisons on volatile quantity between plants carrying the symbiont or not (after log transformation) are also shown (n=9). P-values are corrected with the false discovery rate approach, and significant values are presented in bold. Mean ( $\pm$  SE) quantity of those compounds with a significant difference are represented in Fig. 4. Acetomesitylene: 1,3,5-Trimethyl-2-acetylbenzene, (E)-DMNT: (E)-4,8-Dimethylnona-1,3,7-triene, (E,E)-TMTT: (E,E)-4,8,12-Trimethyltrideca-1,3,7,11-tetraene, ar: Aromatic.

Supplementary Table 2 (cont.)

| Compound                      | Id | Class     | Ret. time<br>( min ) | VIP score | log (quantity) in |                  | p-value       |
|-------------------------------|----|-----------|----------------------|-----------|-------------------|------------------|---------------|
|                               |    |           |                      |           | Symbiont present  | Symbiont removed |               |
| Germacrene D                  | 49 | Terpenoid | 21.43                | 1.6691    | 14±0.18           | 15.2±0.19        | <b>0.0084</b> |
| Acetomesitylene               | 29 | ar-Ketone | 17.53                | 1.5813    | 12.61±0.16        | 13.3±0.11        | <b>0.0234</b> |
| Nerolidol                     | 52 | Terpenoid | 21.94                | 1.5484    | 7.02±1.78         | 10.95±0.26       | 0.0758        |
| β-Cubebene                    | 35 | Terpenoid | 19.47                | 1.5140    | 12.39±0.08        | 13.09±0.16       | <b>0.0148</b> |
| 3,4-Xylenol                   | 27 | Phenol    | 14.51                | 1.4906    | 15.2±0.26         | 16.17±0.19       | <b>0.0304</b> |
| 2,4-Dimethyl furan            | 2  | Ether     | 3.72                 | 1.3694    | 15.54±0.18        | 16.27±0.19       | <b>0.0371</b> |
| Aromadendrene                 | 45 | Terpenoid | 21.02                | 1.3560    | 10.04±0.27        | 11.09±0.19       | <b>0.0304</b> |
| Unknown                       | 21 | NA        | 12.95                | 1.3455    | 14.88±0.1         | 15.51±0.2        | <b>0.0371</b> |
| β-Copaene                     | 40 | Terpenoid | 20.33                | 1.2981    | 12.77±0.22        | 13.66±0.2        | <b>0.0304</b> |
| α-Amorphene                   | 51 | Terpenoid | 21.80                | 1.2720    | 12.32±0.21        | 13.13±0.19       | <b>0.0371</b> |
| 2-Acetyl-3,5-dimethylfuran    | 19 | Ketone    | 12.42                | 1.2445    | 14.91±0.23        | 15.59±0.16       | 0.0586        |
| 2,4-Pentanedione              | 3  | Ketone    | 4.84                 | 1.1952    | 15.77±0.5         | 16.84±0.25       | 0.1002        |
| β-Myrcene                     | 10 | Terpenoid | 9.82                 | 1.1512    | 14.7±0.16         | 14.6±0.1         | 0.6406        |
| Isogermacrene D               | 46 | Terpenoid | 21.07                | 1.1321    | 12.97±0.22        | 13.65±0.19       | 0.0755        |
| ( <i>E,E</i> )-2,4-Hexadienal | 6  | Aldehyde  | 6.98                 | 1.1214    | 12.27±0.33        | 13.18±0.25       | 0.0758        |
| 3-Heptanone                   | 7  | Ketone    | 7.17                 | 1.1089    | 12.07±0.14        | 12.54±0.22       | 0.1221        |
| Unknown                       | 33 | NA        | 19.23                | 1.1087    | 11.19±0.35        | 12.3±0.45        | 0.1002        |
| α-Cadinene                    | 56 | Terpenoid | 22.57                | 1.0895    | 10.84±0.31        | 11.67±0.22       | 0.0758        |
| Unknown sesquiterpene         | 50 | Terpenoid | 21.67                | 1.0756    | 12.36±0.22        | 13±0.21          | 0.0824        |
| γ-Cardinene                   | 53 | Terpenoid | 22.09                | 1.0278    | 12.48±0.26        | 13.14±0.23       | 0.1002        |
| Methyl dihydrojasmonate       | 61 | Ester     | 24.74                | 1.0140    | 12.69±0.4         | 13.29±0.29       | 0.2786        |
| β-Atlantol                    | 59 | Terpenoid | 23.79                | 1.0123    | 12.39±0.31        | 12.9±0.35        | 0.3177        |
| Diethyl adipate               | 34 | Ester     | 19.28                | 1.0009    | 9.7±0.54          | 10.88±0.75       | 0.2647        |
| α-Caryophyllene               | 44 | Terpenoid | 20.86                | 1.0002    | 15.26±0.15        | 15.33±0.14       | 0.7372        |
| δ-Cadinene                    | 54 | Terpenoid | 22.26                | 0.9984    | 12.94±0.22        | 13.44±0.19       | NA            |
| ( <i>E,E</i> )-TMTT           | 58 | Terpenoid | 23.34                | 0.9981    | 17.46±0.15        | 17.84±0.19       | NA            |
| Unknown                       | 64 | NA        | 30.01                | 0.9947    | 13.07±0.3         | 13.06±0.25       | NA            |
| β-Caryophyllene               | 39 | Terpenoid | 20.14                | 0.9817    | 16.12±0.16        | 16.05±0.14       | NA            |
| ( <i>E</i> )-α-Bergamotene    | 41 | Terpenoid | 20.41                | 0.9810    | 14.02±0.15        | 13.97±0.24       | NA            |
| 2,2,6-Trimethylcyclohexanone  | 15 | Ketone    | 10.93                | 0.9796    | 13.18±0.12        | 13.64±0.21       | NA            |
| Chiloscyphone                 | 57 | Terpenoid | 22.67                | 0.9793    | 13.54±0.21        | 14.12±0.29       | NA            |
| ( <i>Z</i> )-α-Bergamotene    | 38 | Terpenoid | 20.01                | 0.9776    | 12.54±0.16        | 12.55±0.19       | NA            |
| 3,3-Dimethyl-2,4-pentanedion  | 8  | Ketone    | 7.82                 | 0.9695    | 12.14±1.53        | 14.08±0.39       | NA            |

**Supplementary Table 2 (cont.)**

| Compound                  | Id | Class     | Ret. time<br>( min ) | VIP score | log (quantity) in |                  | p-value |
|---------------------------|----|-----------|----------------------|-----------|-------------------|------------------|---------|
|                           |    |           |                      |           | Symbiont present  | Symbiont removed |         |
| Geranylinalool            | 65 | Terpenoid | 30.46                | 0.9667    | 13.12±0.26        | 13.09±0.38       | NA      |
| α-Copaene                 | 32 | Terpenoid | 19.17                | 0.9449    | 12.76±0.1         | 12.97±0.11       | NA      |
| β-Springen                | 63 | Terpenoid | 29.36                | 0.9408    | 13.51±0.14        | 13.96±0.23       | NA      |
| (E)-Cadina-1,4-diene      | 55 | Terpenoid | 22.46                | 0.9266    | 11.36±0.16        | 11.64±0.17       | NA      |
| γ-Muurolene               | 48 | Terpenoid | 21.32                | 0.9094    | 12.1±0.22         | 12.54±0.23       | NA      |
| Clovene                   | 31 | Terpenoid | 18.82                | 0.9052    | 11.14±0.27        | 11.66±0.21       | NA      |
| 4-Isopropylcyclohexanol   | 23 | Alcohol   | 13.24                | 0.8891    | 11.96±1.51        | 10.29±1.97       | NA      |
| Linalool                  | 20 | Terpenoid | 12.61                | 0.8778    | 13.55±0.3         | 13.72±0.31       | NA      |
| (Z)-3-Hexen-1-ol, acetate | 12 | Ester     | 10.25                | 0.8555    | 17.95±0.18        | 18.17±0.11       | NA      |
| β-Funebrene               | 36 | Terpenoid | 19.61                | 0.8416    | 9.14±1.19         | 10.92±0.32       | NA      |
| (Z)-β-Ocimene             | 16 | Terpenoid | 11.03                | 0.8370    | 15.44±0.16        | 15.44±0.13       | NA      |
| (E)-Cadina-1(6),4-diene   | 47 | Terpenoid | 21.25                | 0.8276    | 9.19±0.27         | 7.52±1.44        | NA      |
| Alloocimene               | 24 | Terpenoid | 13.32                | 0.8256    | 13.29±0.19        | 13.3±0.16        | NA      |
| (E)-β-Ocimene             | 17 | Terpenoid | 11.35                | 0.8062    | 18.22±0.12        | 18.28±0.1        | NA      |
| Geranylgeraniol           | 66 | Terpenoid | 30.50                | 0.8046    | 14.03±0.13        | 14.38±0.23       | NA      |
| (Z)-3-Hexen-1-ol          | 5  | Alcohol   | 6.47                 | 0.8044    | 16.65±0.19        | 16.79±0.13       | NA      |
| Limonene                  | 14 | Terpenoid | 10.79                | 0.7775    | 14.7±0.15         | 14.7±0.13        | NA      |
| (E)-DMNT                  | 22 | Terpenoid | 13.00                | 0.7410    | 16.14±0.21        | 16.25±0.24       | NA      |
| (E)-β-Ocimene epoxide     | 26 | Terpenoid | 13.65                | 0.7395    | 14.25±0.21        | 14.56±0.2        | NA      |
| Unknown                   | 60 | NA        | 24.33                | 0.7359    | 10.6±1.35         | 12.09±0.26       | NA      |
| (E,E)-Cosmene             | 25 | Terpenoid | 13.34                | 0.6993    | 14.5±0.19         | 14.61±0.11       | NA      |
| Anisole                   | 9  | ar-Ether  | 7.96                 | 0.6942    | 13.69±0.28        | 14.15±0.17       | NA      |
| 1,5,8-p-Menthatriene      | 18 | Terpenoid | 12.09                | 0.6938    | 12.71±0.2         | 12.88±0.11       | NA      |
| Unknown                   | 11 | NA        | 10.20                | 0.6857    | 12.87±0.18        | 12.91±0.1        | NA      |
| (Z)-Lanceol acetate       | 62 | Ester     | 28.35                | 0.6684    | 14.15±0.11        | 14.47±0.27       | NA      |
| 1-Butanol                 | 1  | Alcohol   | 3.10                 | 0.6552    | 15.68±0.22        | 16.06±0.25       | NA      |
| (Z)-Jasmone               | 37 | Ketone    | 19.63                | 0.6488    | 10.05±1.29        | 11.43±0.25       | NA      |
| α-Cubebene                | 30 | Terpenoid | 18.57                | 0.6145    | 9.53±1.22         | 10.52±0.12       | NA      |
| Methyl salicylate         | 28 | ar-Ester  | 15.01                | 0.6035    | 15.65±0.25        | 15.96±0.29       | NA      |
| (E)-β-Farnesene           | 43 | Terpenoid | 20.82                | 0.6004    | 14.18±0.13        | 14.42±0.27       | NA      |
| (E)-2-Hexenal             | 4  | Aldehyde  | 6.39                 | 0.5831    | 12.7±0.26         | 12.94±0.25       | NA      |
| Sesquisabinene            | 42 | Terpenoid | 20.56                | 0.5243    | 11.87±0.17        | 12.01±0.27       | NA      |
| 3-Methylanisole           | 13 | ar-Ether  | 10.57                | 0.2948    | 13.15±0.22        | 13.25±0.17       | NA      |
